# Supplementary material for: Evidence of protein coronas around soft nanoparticles regardless of the chemical nature of the outer surface: structural features and biological consequences
Source: Royal Society of Chemistry journal article supplement (doi:10.1039/d0tb02734k), 2021-01-01
Supplement: d0tb02734k1.pdf [file d0tb02734k1.pdf]

Supporting Information File

**Evidences of Protein Coronas around Soft Nanoparticles Regardless of  
the Chemical Nature of the Outer Surface: Structural Features and  
Biological Consequences**

*Carlos E. de Castro,<sup>†</sup> Karine Panico,<sup>†</sup> Lucas M. Stangherlin,<sup>†</sup> Lindomar J. C.  
Albuquerque,<sup>†</sup> Caroline A. S. Ribeiro,<sup>†</sup> Maria C.C. da Silva,<sup>†</sup> Eliézer Jäger<sup>φ</sup> and  
Fernando C. Giacomelli<sup>†\*</sup>*

<sup>†</sup> Centro de Ciências Naturais e Humanas, Universidade Federal do ABC, Santo André,  
Brazil.

<sup>φ</sup> Institute of Macromolecular Chemistry *v.v.i.*, Academy of Sciences of the Czech  
Republic, Heyrovsky Sq. 2, 162 06, Prague 6, Czech Republic.

\* Corresponding Author: Fernando Carlos Giacomelli  
e-mail. [fernando.giacomelli@ufabc.edu.br](mailto:fernando.giacomelli@ufabc.edu.br)

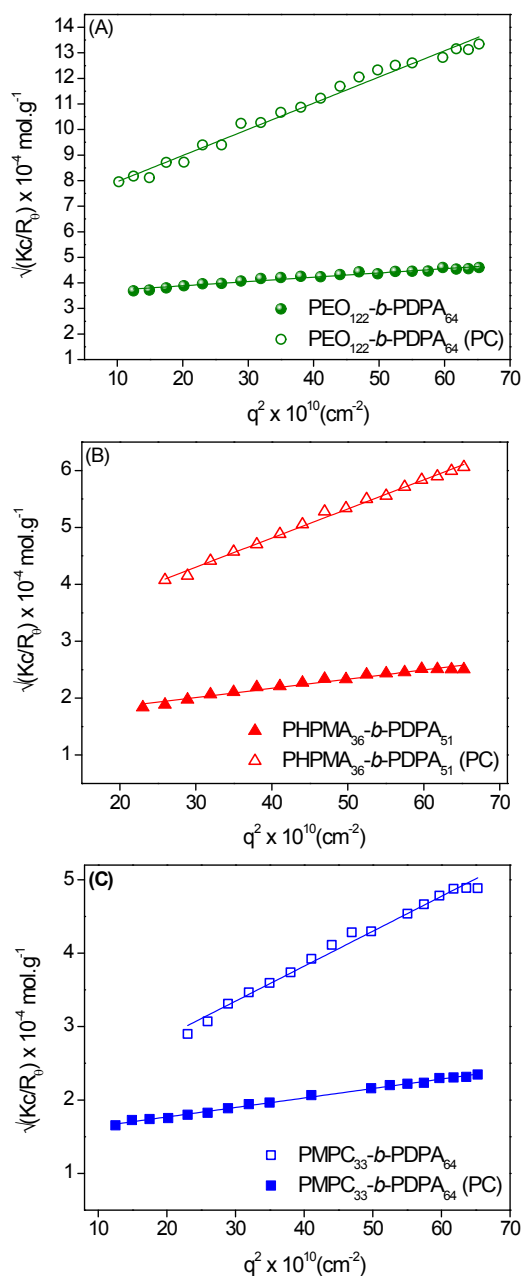

**Figure S1.** Static light scattering characterization (Berry plots) of the block copolymer nanoparticles before and after (PC) plasma incubation according to the legends ( $c = 1.0 \text{ mg} \cdot \text{mL}^{-1}$ , coumarin-6 feeding ratio 0.2%  $w/w$ ).

In the SLS mode, the light scattering intensity was monitored at scattering angles ( $\theta$ ) ranging from 30 to 150°. The radius of gyration ( $R_G$ ) of the pH-responsive assemblies before and after plasma incubation was determined using the Berry approach as it

provides a better approximation of the form factor for large particles ( $R_G > 50$  nm) according to Equation 1S.

$$\left(\frac{1}{I_{sc}(q)}\right)^{1/2} = k\left[1 + \frac{R_G^2 q^2}{6}\right] \quad (1S)$$

where  $k$  is an arbitrary constant. Hence, by measuring the light scattering intensity ( $I_{sc}$ ) at a given angular range, the value of  $R_G$  is estimated from the slope of the curve.

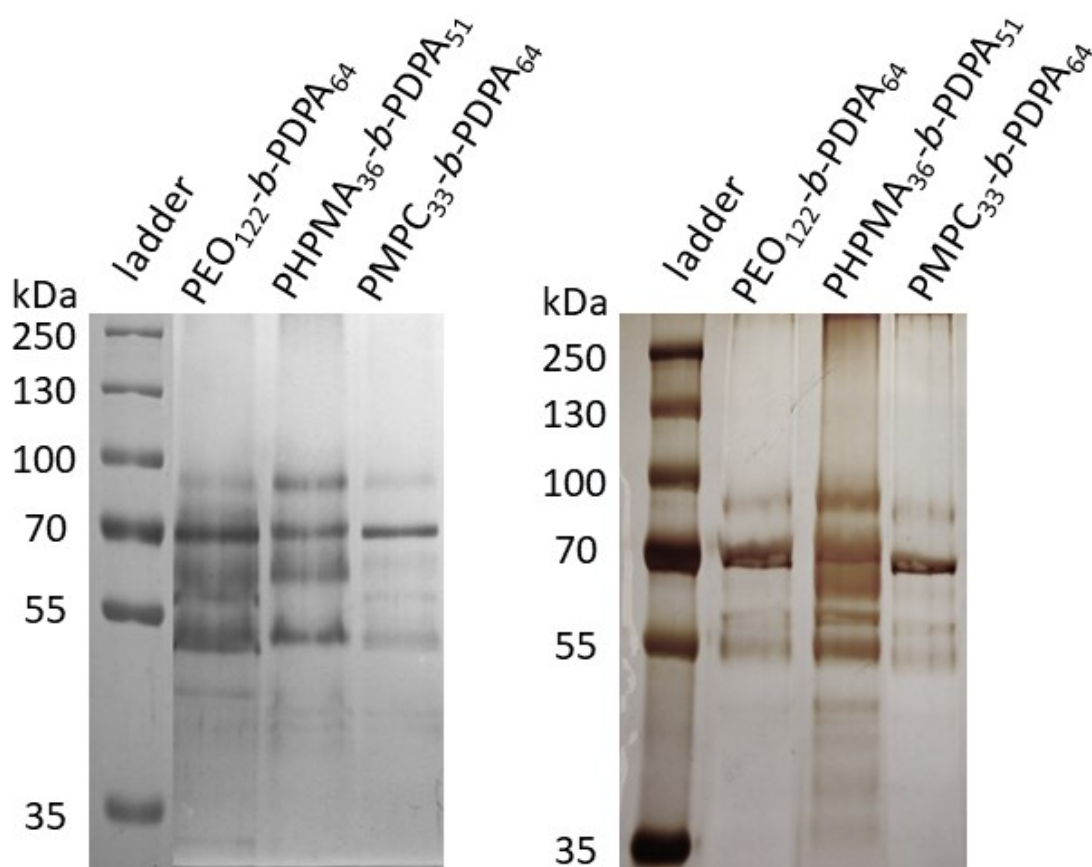

**Figure S2.** Compositional analysis of the hard protein coronas around the PDPA-based nanoparticles as visualized by silver stained SDS-PAGE (performed to check the reproducibility of the patterns reported in Figure 3A).

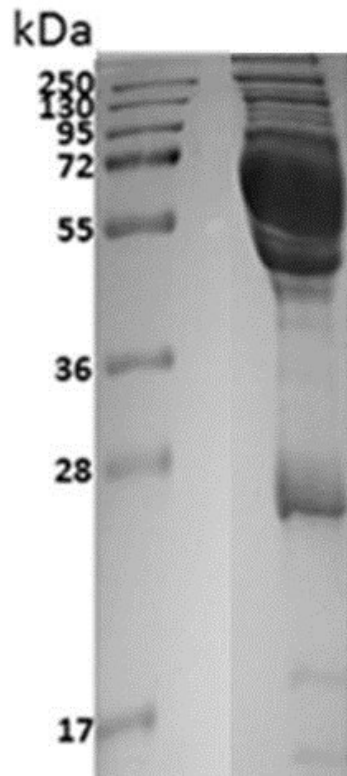

**Figure S3.** Silver stained SDS-PAGE pattern of proteins recovered from pure plasma at 20% v/v.

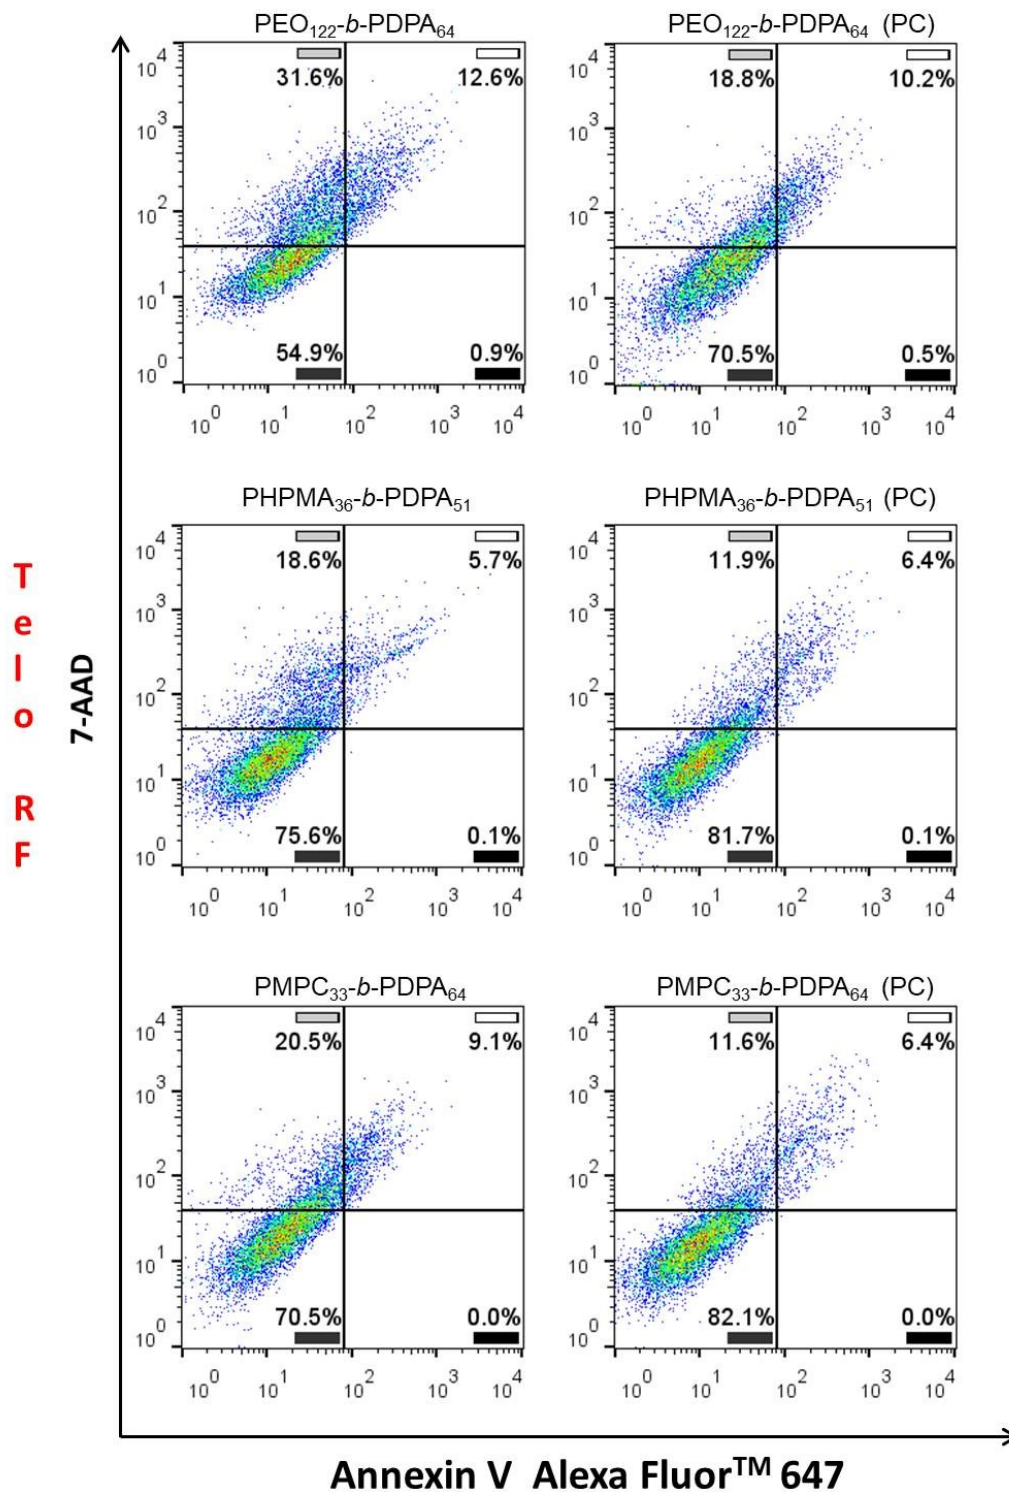

**Figure S4.** 2D dot-plots for the determination of live, apoptotic and necrotic cells exposed to PEO<sub>122</sub>-*b*-PDPA<sub>64</sub>, PHPMA<sub>64</sub>-*b*-PDPA<sub>51</sub> and PMPC<sub>33</sub>-*b*-PDPA<sub>64</sub> nanoparticles before and after (PC) plasma incubation according to the legend ( $c = 1.5 \text{ mg.mL}^{-1}$ ,  $t = 24\text{h}$ ).
